# Supplementary material
Source: PubMed Central journal article supplement (PMC8410676)
Supplement: NIHMS1733944-supplement-Supplemental_Tables.pdf [file NIHMS1733944-supplement-Supplemental_Tables.pdf]

Table 1S. qPCR primer sequences

| Target gene |    | Sequence (5'-3')             |
|-------------|----|------------------------------|
| 18s         | FW | TCGGTCTTATTTTGCTGGTTT        |
|             | RV | ATCGCTAGTTGGCATGGTTT         |
| CD44        | FW | GAATGTAACCTCCGCTACG          |
|             | RV | GAGAGAGAGCCAGGAGACCA         |
| CD133       | FW | AATTCTAATACGACTCACTATAGGGAA  |
|             | RV | GAACAGGGATGATGTTGGGTCTCA     |
| SOX2        | FW | GCTACAGCATGATGCAGGACCA       |
|             | RV | TCTGCGAGCTGGTCATGGAGTT       |
| DNMT1       | FW | ACCGCTTCTACTTCCTCGAGGCCTA    |
|             | RV | GTTGCAGTCCTCTGTGAACACTGTGG   |
| DNMT3a      | FW | GCCGAATTGTGTCTTGGTGGATGACA   |
|             | RV | CCTGGTGGAAATGCACTGCAGAAGGA   |
| TLR3        | FW | CAGTACATCGAGTTCTTGGTTTCAA    |
|             | RV | GAGAAATGTTCCCAGACCCAATC      |
| RAR $\beta$ | FW | AAGTGAGTTGTTTAGAGGTAGGAGGG   |
|             | RV | TAATTACCTAATCCAAATAATCATTACC |

Table 2S. qPCR miRNAs primer sequences

| Target miRNAs    | Sequence                     |
|------------------|------------------------------|
| hsa-miR-29b-3p   | 5'UAGCACCAUUUGAAAUCAGUGUU3'  |
| hsa-miR-29b-1-5p | 5'GCUGGUUUCAUAUGGUGGUUUAGA3' |
| hsa-miR-29c-3p   | 5'UAGCACCAUUUGAAAUCGGUUA3'   |
| hsa-miR-29c-5p   | 5'UGACCGAUUUCUCCUGGUGUUC3'   |
| hsa-miR-148b-3p  | 5'UCAGUGCAUCACAGAACUUUGU3'   |
| hsa-miR-148b-5p  | 5'AAGUUCUGUUUAUACACUCAGGC3'  |
| hsa-miR-152-3p   | 5'UCAGUGCAUGACAGAACUUGG3'    |
| hsa-miR-152-5p   | 5'AGGUUCUGUGAUACACUCCGACU3'  |
| RNU6             | 5'CGCAAGGATGACACGCAAAT3'     |
